# Supplementary material for: Untargeted LC-MS/MS Metabolomics Study of HO-AAVPA and VPA on Breast Cancer Cell Lines
Source: MDPI journal article supplement (doi:10.3390/ijms241914543), 2023-09-26
Supplement: s1 [file s1]

# Untargeted LC–MS/MS Metabolomics Study of HO-AAVPA and VPA on Breast Cancer Cell Lines

Alan Rubén Estrada-Pérez <sup>1</sup>, Juan Benjamín García-Vázquez <sup>1</sup>, Humberto L. Mendoza-Figueroa <sup>1</sup>, Martha Cecilia Rosales-Hernández <sup>2</sup>, Cynthia Fernández-Pomares <sup>1</sup> and José Correa-Basurto <sup>1,\*</sup>

<sup>1</sup> Laboratorio de Diseño y Desarrollo de Nuevos Fármacos e Innovación Biotecnológica, Escuela Superior de Medicina, Instituto Politécnico Nacional, Plan de San Luis y Díaz Mirón s/n, Casco de Santo Tomás, Ciudad de México 11340, Mexico  
<sup>2</sup> Laboratorio de Biofísica y Biocatálisis, Sección de Estudios de Posgrado e Investigación, Escuela Superior de Medicina, Instituto Politécnico Nacional, Plan de San Luis y Díaz Mirón s/n, Casco de Santo Tomás, Ciudad de México 11340, Mexico  
\* Correspondence: jcorreab@ipn.mx

## Supplementary Materials

Table S1. Annotation values of putative metabolites dysregulated in MDA-MB-231 cells.

| Metabolite                                                       | RT (min) | Mass     | HMDB ID     | Score MS | Fit  | RFit | Purity | Method          |
|------------------------------------------------------------------|----------|----------|-------------|----------|------|------|--------|-----------------|
| Aspidospermatine                                                 | 1.609    | 384.2045 | HMDB0030358 | 82.87    | 0.92 | 0.97 | 0.95   | RP-ESI-Negative |
| Arachidonic acid                                                 | 4.228    | 304.2409 | HMDB0001043 | 99.35    | 0.95 | 0.96 | 0.92   | RP-ESI-Negative |
| PA(16:0/16:0)                                                    | 13.62    | 694.4778 | HMDB0000674 | 99.74    | 0.85 | 0.83 | 0.8    | RP-ESI-Negative |
| PE(14:0/22:5(4Z,7Z,10Z,13Z,16Z))                                 | 16.991   | 737.4987 | HMDB0008845 | 98.84    | 0.86 | 0.9  | 0.84   | RP-ESI-Negative |
| PE(20:0/14:0)                                                    | 17.234   | 765.5505 | HMDB0009217 | 99.69    | 0.95 | 0.98 | 0.97   | RP-ESI-Negative |
| Sphinganine                                                      | 2.04     | 301.2976 | HMDB0000269 | 85.08    | 0.98 | 0.88 | 0.91   | RP-ESI-Positive |
| 4,5-Dihydro-1-benzoxepin-3(2H)-one                               | 2.339    | 162.068  | HMDB0029714 | 73.11    | 0.97 | 0.82 | 0.86   | RP-ESI-Positive |
| N-trans-Feruloyloctopamine                                       | 3.984    | 351.0971 | HMDB0032805 | 72.37    | 0.98 | 0.8  | 0.88   | RP-ESI-Positive |
| PC(18:4(6Z,9Z,12Z,15Z)/14:0)                                     | 7.677    | 763.4506 | HMDB0008229 | 74.85    | 0.96 | 0.97 | 0.97   | RP-ESI-Positive |
| PE(15:0/14:0)                                                    | 16.67    | 649.4721 | HMDB0008887 | 99.02    | 0.97 | 1    | 0.99   | RP-ESI-Positive |
| PE(14:0/15:0)                                                    | 16.998   | 649.468  | HMDB0008823 | 99.66    | 0.89 | 0.91 | 0.83   | RP-ESI-Positive |
| PS(18:0/18:0)                                                    | 19.188   | 791.5718 | HMDB0012378 | 78.69    | 1    | 0.89 | 0.97   | RP-ESI-Positive |
| PC(14:0/14:0)                                                    | 19.417   | 677.4936 | HMDB0007866 | 98.64    | 0.99 | 0.99 | 0.99   | RP-ESI-Positive |
| TG(15:0/22:6(4Z,7Z,10Z,13Z,16Z,19Z)/22:6(4Z,7Z,10Z,13Z,16Z,19Z)) | 30.187   | 974.6757 | HMDB0043799 | 97.97    | 0.99 | 0.9  | 0.99   | RP-ESI-Positive |
| TG(15:0/20:4(5Z,8Z,11Z,14Z)/22:6(4Z,7Z,10Z,13Z,16Z,19Z))         | 30.456   | 950.6765 | HMDB0043538 | 97.42    | 0.94 | 0.89 | 0.9    | RP-ESI-Positive |
| TG(14:0/22:4(7Z,10Z,13Z,16Z)/14:0)                               | 31.209   | 864.6598 | HMDB0042691 | 98.22    | 0.9  | 0.92 | 0.88   | RP-ESI-Positive |
| Cer(d18:0/26:1(17Z))                                             | 32.369   | 715.6254 | HMDB0011772 | 80.35    | 0.98 | 0.96 | 0.92   | RP-ESI-Positive |
| Cer(d18:0/26:0)                                                  | 33.189   | 717.6418 | HMDB0011771 | 84.16    | 0.94 | 0.88 | 0.89   | RP-ESI-Positive |
| TG(20:2n6/18:0/20:2n6)                                           | 33.24    | 948.7535 | HMDB0053303 | 96.18    | 0.93 | 0.89 | 0.86   | RP-ESI-Positive |

Table S2. Annotation values of putative metabolites dysregulated in MCF7.

| Metabolite                               | RT (min) | Mass     | HMDB ID     | Score MS | Fit  | RFit | Purity | Method             |
|------------------------------------------|----------|----------|-------------|----------|------|------|--------|--------------------|
| Phenol sulphate                          | 1.385    | 173.9983 | HMDB0060015 | 72.91    | 0.84 | 0.87 | 0.81   | HILIC-ESI-Negative |
| 2-Methyl-3-ketovaleric acid              | 1.653    | 130.0629 | HMDB0000408 | 87.41    | 0.94 | 0.97 | 0.92   | HILIC-ESI-Negative |
| Palmitoyl glucuronide                    | 1.934    | 418.2914 | HMDB0010331 | 92.13    | 0.94 | 0.99 | 0.8    | HILIC-ESI-Negative |
| Pyrogallol-2-O-sulphate                  | 1.938    | 205.9884 | HMDB0060018 | 97.51    | 0.88 | 0.84 | 0.88   | HILIC-ESI-Negative |
| Valdiate                                 | 1.938    | 310.1783 | HMDB0040980 | 85.38    | 0.92 | 0.86 | 0.87   | HILIC-ESI-Negative |
| 2,6-Di-tert-butyl-1,4-benzenediol        | 1.94     | 222.1612 | HMDB0040178 | 84.85    | 0.91 | 0.97 | 0.84   | HILIC-ESI-Negative |
| 1-Hydroxy-2-pentanone                    | 1.959    | 102.0681 | HMDB0059678 | 87.57    | 0.99 | 0.98 | 0.98   | HILIC-ESI-Negative |
| Uracil                                   | 2.006    | 112.0272 | HMDB0000300 | 87.83    | 1    | 0.92 | 0.9    | HILIC-ESI-Negative |
| 3'-Hydroxy-3,4,5,4'-tetramethoxystilbene | 2.058    | 302.1142 | HMDB0041653 | 78.21    | 0.85 | 0.87 | 0.81   | HILIC-ESI-Negative |
| Acetoxyacetone                           | 2.173    | 116.0471 | HMDB0034466 | 87.8     | 0.94 | 0.96 | 0.92   | HILIC-ESI-Negative |
| Deoxyfructosazine                        | 2.322    | 418.1186 | HMDB0038696 | 80.38    | 0.94 | 0.99 | 0.82   | HILIC-ESI-Negative |
| Portulacaxanthin II                      | 2.322    | 420.1159 | HMDB0012281 | 87.37    | 0.89 | 0.84 | 0.88   | HILIC-ESI-Negative |
| Leucyl-Leucine                           | 2.638    | 244.1783 | HMDB0028933 | 99.7     | 0.99 | 1    | 0.82   | HILIC-ESI-Negative |
| Homocysteinesulfinic acid                | 3.361    | 167.0253 | HMDB0006462 | 99.25    | 0.86 | 0.91 | 0.92   | HILIC-ESI-Negative |
| N-Acetyl-L-methionine                    | 3.381    | 191.0612 | HMDB0011745 | 77.58    | 0.94 | 0.95 | 0.91   | HILIC-ESI-Negative |
| Pantothenic acid                         | 3.86     | 219.1106 | HMDB0000210 | 86.81    | 1    | 0.95 | 0.92   | HILIC-ESI-Negative |
| Pantothenic acid                         | 3.86     | 219.1106 | HMDB0000210 | 86.81    | 1    | 0.95 | 0.92   | HILIC-ESI-Negative |
| Phenylalanyl-Glycine                     | 4.214    | 222.1001 | HMDB0028995 | 86.32    | 0.97 | 0.82 | 0.86   | HILIC-ESI-Negative |
| Sakacin P                                | 4.564    | 216.1105 | HMDB0038239 | 86.37    | 0.98 | 0.83 | 0.89   | HILIC-ESI-Negative |
| (±)-2,2'-Iminobispropanoic acid          | 4.598    | 161.0688 | HMDB0033747 | 98.97    | 0.96 | 0.99 | 0.97   | HILIC-ESI-Negative |
| Gamma-glutamyl-Phenylalanine             | 5.061    | 293.1373 | HMDB0029156 | 85.22    | 1    | 0.97 | 0.91   | HILIC-ESI-Negative |
| Racemethionine                           | 5.566    | 149.0507 | HMDB0033951 | 79.02    | 0.88 | 0.9  | 0.89   | HILIC-ESI-Negative |

|                                                |        |          |             |       |      |      |      |                    |
|------------------------------------------------|--------|----------|-------------|-------|------|------|------|--------------------|
| L-Aspartate-semialdehyde                       | 5.986  | 117.0423 | HMDB0012249 | 87.25 | 0.85 | 0.81 | 0.8  | HILIC-ESI-Negative |
| Phenylalanylglutamine                          | 5.987  | 293.1372 | HMDB0028993 | 85.89 | 1    | 1    | 0.97 | HILIC-ESI-Negative |
| L-N-(3-Carboxypropyl)glutamine                 | 6.098  | 232.1054 | HMDB0029393 | 85.87 | 0.92 | 0.95 | 0.92 | HILIC-ESI-Negative |
| Valyl-Alanine                                  | 6.202  | 188.1159 | HMDB0029120 | 87.37 | 0.93 | 0.84 | 0.85 | HILIC-ESI-Negative |
| Alanyl-Glycine                                 | 6.572  | 146.0686 | HMDB0006899 | 79.78 | 0.82 | 0.83 | 0.82 | HILIC-ESI-Negative |
| Glycyl-Hydroxyproline                          | 6.599  | 188.0793 | HMDB0011173 | 86.71 | 0.97 | 0.96 | 0.9  | HILIC-ESI-Negative |
| Ethyl nitrite                                  | 7.112  | 75.0319  | HMDB0031239 | 87.75 | 0.9  | 0.9  | 0.84 | HILIC-ESI-Negative |
| Methoxyacetic acid                             | 9.013  | 90.0315  | HMDB0041929 | 86.2  | 0.85 | 0.87 | 0.8  | HILIC-ESI-Negative |
| L-Asparagine                                   | 10.002 | 132.0533 | HMDB0000168 | 83.89 | 0.88 | 0.9  | 0.82 | HILIC-ESI-Negative |
| Dihydroandrosterone                            | 2.304  | 210.1008 | HMDB0015441 | 84.6  | 1    | 0.95 | 0.9  | HILIC-ESI-Positive |
| Kanzonol O                                     | 2.887  | 330.1981 | HMDB0000554 | 84.37 | 0.97 | 0.82 | 0.86 | HILIC-ESI-Positive |
| LysoPC(16:1(9Z))                               | 2.975  | 382.1421 | HMDB0041102 | 85.61 | 0.98 | 0.8  | 0.88 | HILIC-ESI-Positive |
| 1-Nitroheptane                                 | 3.457  | 493.3159 | HMDB0010383 | 79.2  | 0.96 | 0.97 | 0.97 | HILIC-ESI-Positive |
| Styrene                                        | 3.503  | 145.1102 | HMDB0013811 | 98.78 | 0.94 | 0.94 | 0.91 | HILIC-ESI-Positive |
| (S)-Homostachydrine                            | 3.549  | 157.1102 | HMDB0033433 | 86.44 | 0.85 | 0.82 | 0.86 | HILIC-ESI-Positive |
| Buprenorphine                                  | 3.684  | 467.3006 | HMDB0015057 | 99.43 | 0.95 | 0.99 | 0.99 | HILIC-ESI-Positive |
| 7-Methylguanosine                              | 4.31   | 297.1072 | HMDB0001107 | 85.29 | 0.92 | 0.91 | 0.92 | HILIC-ESI-Positive |
| cis-4-Decenedioic acid                         | 4.381  | 200.1052 | HMDB0000603 | 87.19 | 0.99 | 0.9  | 0.99 | HILIC-ESI-Positive |
| L-Hexanoylcarnitine                            | 4.381  | 259.1788 | HMDB0000756 | 99.2  | 0.87 | 0.8  | 0.82 | HILIC-ESI-Positive |
| 5-Aminoimidazole-4-carboxamide                 | 4.915  | 126.0543 | HMDB0003192 | 86.42 | 0.94 | 0.91 | 0.9  | HILIC-ESI-Positive |
| 5-Butyltetrahydro-2-oxo-3-furancarboxylic acid | 5.728  | 186.0898 | HMDB0030992 | 85.87 | 0.9  | 0.92 | 0.88 | HILIC-ESI-Positive |
| 4-Hydroxy-2-butenic acid gamma-lactone         | 9.052  | 84.0212  | HMDB0032330 | 87.92 | 0.98 | 0.95 | 0.92 | HILIC-ESI-Positive |
| Leucyl-Proline                                 | 9.514  | 228.1472 | HMDB0011175 | 86.55 | 0.93 | 0.91 | 0.9  | HILIC-ESI-Positive |
| Pyro-L-glutaminy-L-glutamine                   | 9.76   | 257.101  | HMDB0039229 | 84.54 | 0.94 | 0.88 | 0.92 | HILIC-ESI-Positive |
| 3'-O-Methyladenosine                           | 9.988  | 281.1122 | HMDB0006023 | 99.56 | 0.93 | 0.89 | 0.86 | HILIC-ESI-Positive |
| N-Ethylglycine                                 | 10.306 | 103.063  | HMDB0041945 | 87.23 | 0.99 | 0.91 | 0.94 | HILIC-ESI-Positive |
| N-Acetylglutamine                              | 13.357 | 188.0799 | HMDB0006029 | 87.16 | 0.89 | 0.84 | 0.9  | HILIC-ESI-Positive |
| 3-Acetamidobutanal                             | 15.119 | 129.079  | HMDB0059649 | 87.84 | 0.99 | 1    | 0.92 | HILIC-ESI-Positive |
| LysoPE(0:0/18:0)                               | 3.47   | 481.3172 | HMDB0011129 | 96.91 | 0.89 | 0.92 | 0.84 | RP-ESI-Negative    |
| LysoPE(0:0/16:0)                               | 3.613  | 453.2859 | HMDB0011473 | 98.04 | 0.85 | 0.86 | 0.81 | RP-ESI-Negative    |
| LysoPE(18:1(9Z)/0:0)                           | 3.902  | 479.3022 | HMDB0011506 | 98.17 | 0.97 | 0.92 | 0.8  | RP-ESI-Negative    |
| LysoPE(18:0/0:0)                               | 5.303  | 481.3172 | HMDB0011130 | 99.29 | 0.94 | 0.96 | 0.9  | RP-ESI-Negative    |
| PS(18:1(9Z)/16:0)                              | 13.294 | 761.5202 | HMDB0012387 | 99.07 | 0.99 | 0.99 | 0.94 | RP-ESI-Negative    |
| Cer(d18:1/14:0)                                | 18.931 | 509.4802 | HMDB0011773 | 98.52 | 0.94 | 0.94 | 0.93 | RP-ESI-Negative    |
| PE(18:1(9Z)/14:0)                              | 18.944 | 689.4994 | HMDB0009052 | 95.22 | 0.88 | 0.9  | 0.87 | RP-ESI-Negative    |
| PE(14:1(9Z)/20:1(11Z))                         | 19.288 | 715.516  | HMDB0008867 | 95.67 | 0.85 | 0.82 | 0.83 | RP-ESI-Negative    |
| PE(14:1(9Z)/22:2(13Z,16Z))                     | 19.848 | 741.5309 | HMDB0008876 | 97.35 | 0.95 | 0.98 | 0.86 | RP-ESI-Negative    |

|                                                                             |        |           |             |       |      |       |      |                 |
|-----------------------------------------------------------------------------|--------|-----------|-------------|-------|------|-------|------|-----------------|
| Cer(d18:0/14:0)                                                             | 19.935 | 511.4958  | HMDB0011759 | 98.9  | 0.94 | 0.92  | 0.94 | RP-ESI-Negative |
| PE(22:2(13Z,16Z)/14:1(9Z))                                                  | 20.906 | 741.5303  | HMDB0009548 | 98.94 | 0.99 | 0.92  | 0.92 | RP-ESI-Negative |
| PE(16:1(9Z)/24:1(15Z))                                                      | 20.975 | 791.5476  | HMDB0009684 | 95.47 | 0.98 | 0.97  | 0.91 | RP-ESI-Negative |
| PE(14:0/22:2(13Z,16Z))                                                      | 21.66  | 743.5479  | HMDB0008843 | 97.1  | 0.81 | 0.81  | 0.82 | RP-ESI-Negative |
| PE(24:0/14:0)                                                               | 21.933 | 743.5464  | HMDB0009547 | 97.27 | 0.97 | 0.96  | 0.95 | RP-ESI-Negative |
| Cer(d18:0/16:0)                                                             | 22.429 | 539.5272  | HMDB0011760 | 98.3  | 0.94 | 0.96  | 0.9  | RP-ESI-Negative |
| PE-NMe(18:1(9Z)/18:1(9Z))                                                   | 22.655 | 757.5617  | HMDB0010565 | 99.4  | 0.99 | 0.99  | 0.94 | RP-ESI-Negative |
| 'PE(22:2(13Z,16Z)/16:1(9Z))'                                                | 23.171 | 769.5616  | HMDB0009551 | 99.54 | 0.97 | 0.82  | 0.86 | RP-ESI-Negative |
| PE(18:1(11Z)/24:1(15Z))                                                     | 23.302 | 873.6453  | HMDB0009047 | 98.75 | 0.98 | 0.8   | 0.88 | RP-ESI-Negative |
| 2-O-(4,7,10,13,16,19-Docosahexaenoyl)-1-O-hexadecylglycero-3-phosphocholine | 23.309 | 851.6024  | HMDB0013409 | 75.72 | 0.96 | 0.97  | 0.97 | RP-ESI-Negative |
| PE(16:0/22:2(13Z,16Z))                                                      | 23.693 | 771.578   | HMDB0008942 | 96.98 | 0.96 | 0.97  | 0.97 | RP-ESI-Negative |
| 1-[1,4-Dihydro-4-nonyl-5-(1-oxodecyl)-3-pyridinyl]-1-dodecanone             | 23.851 | 603.5186  | HMDB0035518 | 75.05 | 0.97 | 0.89  | 0.96 | RP-ESI-Negative |
| PE(24:1(15Z)/14:0)                                                          | 25.536 | 773.5927  | HMDB0009745 | 98.41 | 0.89 | 0.91  | 0.83 | RP-ESI-Negative |
| PE(24:1(15Z)/16:1(9Z))                                                      | 25.552 | 799.6087  | HMDB0009749 | 99.04 | 0.93 | 0.89  | 0.97 | RP-ESI-Negative |
| 1,1'-(1,4-Dihydro-4-nonyl-3,5-pyridinediyl)bis[1-decanone]                  | 25.816 | 631.5505  | HMDB0035519 | 71.09 | 0.99 | 0.99  | 0.99 | RP-ESI-Negative |
| 1,1'-(1,4-Dihydro-4-nonyl-3,5-pyridinediyl)bis[1-dodecanone]                | 25.816 | 631.5505  | HMDB0035519 | 71.09 | 0.99 | 0.99  | 0.99 | RP-ESI-Negative |
| Campesterol linoleate                                                       | 26.13  | 708.6012  | HMDB0036287 | 78.97 | 0.92 | 0.91  | 0.92 | RP-ESI-Negative |
| PE-NMe2(16:0/18:1(9Z))                                                      | 26.134 | 745.5652  | HMDB0010568 | 70.04 | 0.95 | 0.95  | 0.86 | RP-ESI-Negative |
| PE(24:1(15Z)/18:1(9Z))                                                      | 26.963 | 827.6396  | HMDB0009752 | 98.58 | 0.9  | 0.94  | 0.92 | RP-ESI-Negative |
| Cer(d18:0/24:1(15Z))                                                        | 27.711 | 649.636   | HMDB0011769 | 96.78 | 1    | 0.99  | 1    | RP-ESI-Negative |
| PE(24:1(15Z)/18:0)                                                          | 28.133 | 829.6556  | HMDB0009750 | 99.17 | 0.99 | 0.96  | 0.97 | RP-ESI-Negative |
| CL(18:2(9Z,12Z)/18:0/18:2(9Z,12Z)/16:1(9Z))                                 | 28.672 | 677.668   | HMDB0011772 | 96.91 | 0.95 | 0.99  | 0.97 | RP-ESI-Negative |
| Aprobarbital                                                                | 29.168 | 1455.0164 | HMDB0058719 | 90.01 | 0.84 | 0.82  | 0.87 | RP-ESI-Negative |
| Acetophenazine                                                              | 1.721  | 433.1782  | HMDB0015196 | 70.99 | 0.83 | 70.99 | 0.83 | RP-ESI-Positive |
| LysoPC(14:0)                                                                | 2.553  | 467.3009  | HMDB0010379 | 99.48 | 0.94 | 0.93  | 0.84 | RP-ESI-Positive |
| LysoPC(16:0)                                                                | 3.775  | 495.3327  | HMDB0010382 | 99.27 | 0.96 | 0.88  | 0.88 | RP-ESI-Positive |
| PC(14:0/14:0)                                                               | 15.438 | 677.4999  | HMDB0007866 | 99.24 | 0.96 | 0.97  | 0.98 | RP-ESI-Positive |
| PC(18:2(9Z,12Z)/18:4(6Z,9Z,12Z,15Z))                                        | 15.441 | 777.531   | HMDB0008142 | 99.49 | 0.95 | 0.98  | 0.84 | RP-ESI-Positive |
| CL(18:1(9Z)/16:0/18:1(9Z)/18:0)                                             | 16.28  | 1433.0405 | HMDB0058322 | 72.85 | 0.85 | 0.86  | 0.81 | RP-ESI-Positive |
| PE(22:6(4Z,7Z,10Z,13Z,16Z,19Z)/16:1(9Z))                                    | 16.429 | 761.4997  | HMDB0009683 | 99.14 | 0.97 | 0.92  | 0.8  | RP-ESI-Positive |
| PC(18:2(9Z,12Z)/18:3(6Z,9Z,12Z))                                            | 16.562 | 779.546   | HMDB0008140 | 99.61 | 0.95 | 0.9   | 0.93 | RP-ESI-Positive |
| PC(18:3(6Z,9Z,12Z)/16:0)                                                    | 17.024 | 755.5464  | HMDB0008166 | 99.46 | 0.98 | 0.97  | 0.98 | RP-ESI-Positive |
| PE(14:0/22:5(4Z,7Z,10Z,13Z,16Z))                                            | 17.109 | 737.4995  | HMDB0008845 | 92.48 | 0.89 | 0.91  | 0.83 | RP-ESI-Positive |
| PE(22:5(7Z,10Z,13Z,16Z,19Z)/14:0)                                           | 17.606 | 737.4993  | HMDB0009646 | 83.55 | 0.93 | 0.89  | 0.97 | RP-ESI-Positive |
| PE(20:3(8Z,11Z,14Z)/14:0)                                                   | 17.893 | 713.4996  | HMDB0009349 | 99.81 | 0.99 | 0.99  | 0.99 | RP-ESI-Positive |
| Cohibin D                                                                   | 18.705 | 576.5114  | HMDB0035398 | 99.4  | 0.9  | 0.92  | 0.81 | RP-ESI-Positive |
| PC(16:0/15:0)                                                               | 18.979 | 719.5465  | HMDB0007967 | 99.54 | 1    | 0.99  | 1    | RP-ESI-Positive |
| PC(14:1(9Z)/15:0)                                                           | 19.111 | 689.4998  | HMDB0007901 | 99.82 | 0.95 | 1     | 0.97 | RP-ESI-Positive |
| CL(18:1(9Z)/18:0/18:2(9Z,12Z)/18:0)                                         | 19.377 | 1473.074  | HMDB0058362 | 75.81 | 0.89 | 0.92  | 0.84 | RP-ESI-Positive |
| PE(20:2(11Z,14Z)/14:0)                                                      | 19.454 | 715.5151  | HMDB0009283 | 99.82 | 0.85 | 1     | 0.81 | RP-ESI-Positive |
| PC(18:3(6Z,9Z,12Z)/18:0)                                                    | 19.5   | 783.5777  | HMDB0008168 | 99.75 | 0.97 | 0.92  | 0.8  | RP-ESI-Positive |
| PC(18:3(6Z,9Z,12Z)/15:0)                                                    | 20.02  | 741.5313  | HMDB0008165 | 99.68 | 0.94 | 0.96  | 0.91 | RP-ESI-Positive |

|                                                  |        |          |             |       |      |      |      |                 |
|--------------------------------------------------|--------|----------|-------------|-------|------|------|------|-----------------|
| PC(20:5(5Z,8Z,11Z,14Z,17Z)/15:0)                 | 20.21  | 765.531  | HMDB0008494 | 85.29 | 1    | 0.99 | 0.94 | RP-ESI-Positive |
| PC(15:0/18:3(9Z,12Z,15Z))                        | 20.346 | 741.5309 | HMDB0007942 | 99.77 | 0.98 | 0.95 | 0.9  | RP-ESI-Positive |
| PC(18:1(9Z)/18:1(9Z))                            | 21.214 | 785.5934 | HMDB0000593 | 99.66 | 0.92 | 0.86 | 0.9  | RP-ESI-Positive |
| PC(16:1(9Z)/15:0)                                | 21.534 | 717.5307 | HMDB0008000 | 99.86 | 0.94 | 0.94 | 0.93 | RP-ESI-Positive |
| Ceramide (d18:1/16:0)                            | 21.649 | 537.5118 | HMDB0004949 | 99.76 | 0.89 | 0.89 | 0.8  | RP-ESI-Positive |
| PC(18:2(9Z,12Z)/15:0)                            | 21.827 | 743.5465 | HMDB0008132 | 99.79 | 0.91 | 0.95 | 0.83 | RP-ESI-Positive |
| PC(18:2(9Z,12Z)/20:1(11Z))                       | 21.886 | 811.6086 | HMDB0008144 | 99.78 | 0.92 | 1    | 0.87 | RP-ESI-Positive |
| PC(22:5(7Z,10Z,13Z,16Z,19Z)/20:0)                | 22.913 | 863.6398 | HMDB0008701 | 99.49 | 0.99 | 0.94 | 0.93 | RP-ESI-Positive |
| PE(24:1(15Z)/18:4(6Z,9Z,12Z,15Z))                | 23.157 | 821.5933 | HMDB0009756 | 91.03 | 0.85 | 0.88 | 0.81 | RP-ESI-Positive |
| PC(22:5(7Z,10Z,13Z,16Z,19Z)/22:1(13Z))           | 23.26  | 889.6549 | HMDB0008710 | 99.25 | 1    | 0.96 | 0.92 | RP-ESI-Positive |
| PC(18:2(9Z,12Z)/20:0)                            | 23.571 | 821.5939 | HMDB0009531 | 92.27 | 0.99 | 0.98 | 0.82 | RP-ESI-Positive |
| SM(d18:0/26:1(17Z))                              | 23.578 | 813.6248 | HMDB0008143 | 99.82 | 1    | 1    | 0.99 | RP-ESI-Positive |
| Cer(d18:1/24:1(15Z))                             | 27.4   | 647.6215 | HMDB0004953 | 95.55 | 0.93 | 0.89 | 0.97 | RP-ESI-Positive |
| Cer(d18:1/24:0)                                  | 27.857 | 649.6367 | HMDB0004956 | 99.6  | 0.99 | 0.99 | 0.99 | RP-ESI-Positive |
| Glucosylceramide (d18:1/26:0)                    | 28.113 | 839.7203 | HMDB0004977 | 94.33 | 0.92 | 0.91 | 0.92 | RP-ESI-Positive |
| PE(18:0/24:1(15Z))                               | 28.217 | 829.6555 | HMDB0009014 | 99.78 | 0.87 | 0.8  | 0.82 | RP-ESI-Positive |
| Cer(d18:1/26:0)                                  | 29.335 | 677.6682 | HMDB0004955 | 99.74 | 0.99 | 0.9  | 0.99 | RP-ESI-Positive |
| TG(18:4(6Z,9Z,12Z,15Z)/16:0/18:4(6Z,9Z,12Z,15Z)) | 29.37  | 884.6291 | HMDB0055369 | 88.08 | 0.94 | 0.89 | 0.9  | RP-ESI-Positive |
| TG(14:1(9Z)/16:0/14:1(9Z))                       | 29.796 | 768.6237 | HMDB0047770 | 99.35 | 0.9  | 0.92 | 0.88 | RP-ESI-Positive |
| CL(18:1(9Z)/16:1(9Z)/18:1(9Z)/16:1(9Z))          | 29.821 | 1400.971 | HMDB0058384 | 96.27 | 0.98 | 0.95 | 0.92 | RP-ESI-Positive |
| TG(14:0/14:0/20:4(5Z,8Z,11Z,14Z))                | 29.888 | 836.6292 | HMDB0042080 | 90.57 | 0.93 | 0.91 | 0.9  | RP-ESI-Positive |
| TG(14:1(9Z)/15:0/16:1(9Z))                       | 30.022 | 798.6143 | HMDB0047748 | 88.81 | 0.94 | 0.88 | 0.89 | RP-ESI-Positive |
| TG(16:1(9Z)/14:0/18:3(9Z,12Z,15Z))               | 30.171 | 836.6291 | HMDB0048428 | 99.23 | 0.93 | 0.89 | 0.86 | RP-ESI-Positive |
| TG(20:3n6/14:0/18:3(9Z,12Z,15Z))                 | 30.22  | 872.6947 | HMDB0053658 | 90.81 | 0.92 | 0.97 | 0.95 | RP-ESI-Positive |
| Ubisemiquinone                                   | 30.324 | 862.684  | HMDB0013111 | 99.69 | 0.95 | 0.96 | 0.92 | RP-ESI-Positive |
| TG(16:1(9Z)/14:1(9Z)/18:1(9Z))                   | 30.378 | 822.6706 | HMDB0048569 | 99.76 | 0.85 | 0.83 | 0.8  | RP-ESI-Positive |
| TG(14:0/22:4(7Z,10Z,13Z,16Z)/14:0)               | 30.771 | 848.6856 | HMDB0042691 | 99.14 | 0.95 | 0.98 | 0.97 | RP-ESI-Positive |
| SM(d18:1/26:0)                                   | 30.773 | 843.7297 | HMDB0011698 | 98.43 | 0.86 | 0.81 | 0.8  | RP-ESI-Positive |
